# Supplementary material for: Bovine Meat and Milk Factor-like Sequences Are Frequently Detected in Renal Cell Carcinoma Tissues
Source: MDPI journal article supplement (doi:10.3390/cancers16091746), 2024-04-29
Supplement: s1 [file s1]

### Legends to the supplementary tables

**Table S 1A:** Clinicopathological data and consensus BMMF1 and 2 DNA PCR results of the RCC Test Collection

| Sample ID* | Tissue Loc. | Gender | Age | Diagnosis | Clinical Stage | BMMF1 | BMMF2 |
|------------|-------------|--------|-----|-----------|----------------|-------|-------|
| 1A         | TC          | M      | 62  | CCRCC     | 1A             | -     | -     |
| 1B         | T1          | M      | 62  | CCRCC     | 1A             | +     | -     |
| 1C         | T2          | M      | 62  | CCRCC     | 1A             | +     | -     |
| 1D         | T3          | M      | 62  | CCRCC     | 1A             | +     | -     |
| 2D         | TC          | M      | 70  | CCRCC     | 3A             | -     | -     |
| 2A         | T1          | M      | 70  | CCRCC     | 3A             | -     | +     |
| 2E         | T2          | M      | 70  | CCRCC     | 3A             | -     | -     |
| 2B         | T3          | M      | 70  | CCRCC     | 3A             | +     | -     |
| 3A         | TC          | F      | 75  | PRCC      | 3A             | +     | -     |
| 3C         | T1          | F      | 75  | PRCC      | 3A             | +     | -     |
| 3D         | T2          | F      | 75  | PRCC      | 3A             | +     | -     |
| 3E         | T3          | F      | 75  | PRCC      | 3A             | -     | -     |
| 4C         | TC          | M      | 73  | CCRCC     | 3A             | -     | +     |
| 4B         | T1          | M      | 73  | CCRCC     | 3A             | -     | -     |
| 4D         | T2          | M      | 73  | CCRCC     | 3A             | -     | -     |
| 4E         | T3          | M      | 73  | CCRCC     | 3A             | -     | -     |
| 5A         | TC          | F      | 69  | CCRCC     | 1A             | -     | -     |
| 5C         | T1          | F      | 69  | CCRCC     | 1A             | -     | -     |
| 5D         | T2          | F      | 69  | CCRCC     | 1A             | +     | -     |
| 5E         | T3          | F      | 69  | CCRCC     | 1A             | -     | -     |
| 6A         | TC          | M      | 77  | PRCC      | 3A             | +     | -     |
| 6C         | T1          | M      | 77  | PRCC      | 3A             | -     | -     |
| 6D         | T2          | M      | 77  | PRCC      | 3A             | +     | -     |
| 6E         | T3          | M      | 77  | PRCC      | 3A             | -     | -     |
| 7E         | TC          | M      | 73  | PRCC      | 1B             | -     | -     |
| 7C         | T1          | M      | 73  | PRCC      | 1B             | -     | -     |
| 7B         | T2          | M      | 73  | PRCC      | 1B             | -     | -     |
| 7A         | T3          | M      | 73  | PRCC      | 1B             | -     | -     |
| 8E         | TC          | M      | 43  | CCRCC     | 1B             | -     | -     |
| 8C         | T1          | M      | 43  | CCRCC     | 1B             | -     | +     |
| 8B         | T2          | M      | 43  | CCRCC     | 1B             | -     | -     |
| 8A         | T3          | M      | 43  | CCRCC     | 1B             | -     | -     |
| 9A         | TC          | F      | 77  | CCRCC     | 3A             | -     | +     |
| 9C         | T1          | F      | 77  | CCRCC     | 3A             | -     | -     |
| 9D         | T2          | F      | 77  | CCRCC     | 3A             | -     | -     |
| 9E         | T3          | F      | 77  | CCRCC     | 3A             | -     | -     |
| 10A        | TC          | M      | 84  | CCRCC     | 1A             | -     | -     |
| 10C        | T1          | M      | 84  | CCRCC     | 1A             | -     | -     |
| 10D        | T2          | M      | 84  | CCRCC     | 1A             | -     | -     |
| 10E        | T3          | M      | 84  | CCRCC     | 1A             | -     | -     |
| 11A        | TC          | M      | 85  | CCRCC     | 3A             | -     | -     |
| 11D        | T1          | M      | 85  | CCRCC     | 3A             | +     | -     |
| 11C        | T2          | M      | 85  | CCRCC     | 3A             | -     | -     |
| 11E        | T3          | M      | 85  | CCRCC     | 3A             | -     | -     |

M, Male; F, Female; CCRCC, Clear Cell Renal Cell Carcinoma; PRCC, Papillary Renal Cell Carcinoma; BMMF, Bovine Meat and Milk Factor; Tissue Loc, Tissue Localisation (TC, T1, T2, T3) according to Fig 1A; +, positive (as confirmed by sequencing); -, negative; \*, Samples were tested as blind choice.

**Table S 1B:** Clinicopathological data and consensus BMMF1 and 2 DNA PCR results of the RCC Validation Collection

| Lab# | Age | Gender | Diagnosis | Clinical Stage | BMMF1 | BMMF2 | Lab # | Age | Gender | Diagnosis | Clinical Stage | BMMF1 | BMMF2 |
|------|-----|--------|-----------|----------------|-------|-------|-------|-----|--------|-----------|----------------|-------|-------|
| 1    | 33  | F      | CCRCC     | 3              | -     | -     | 77    | 63  | F      | CCRCC     | 2              | -     | -     |
| 2    | 69  | M      | CCRCC     | 2              | -     | -     | 78    | 62  | F      | CCRCC     | 2              | -     | -     |
| 3    | 73  | M      | CCRCC     | 2              | -     | -     | 79    | 59  | M      | CCRCC     | 3              | -     | -     |
| 4    | 70  | F      | CCRCC     | 2              | -     | -     | 80    | 53  | F      | CCRCC     | 3              | -     | -     |
| 5    | 61  | F      | CCRCC     | 2              | -     | -     | 81    | 36  | F      | CCRCC     | 2              | +     | -     |
| 6    | 64  | M      | CCRCC     | 3              | -     | -     | 82    | 68  | F      | CCRCC     | 2              | -     | +     |
| 7    | 31  | M      | CCRCC     | 2              | -     | -     | 83    | 52  | M      | CCRCC     | 1              | -     | -     |
| 8    | 67  | F      | CCRCC     | 2              | -     | -     | 84    | 28  | M      | CCRCC     | 2              | -     | -     |
| 9    | 70  | F      | CCRCC     | 2              | -     | -     | 85    | 66  | F      | PRCC      | 4              | -     | -     |
| 10   | 71  | M      | CCRCC     | 2              | +     | -     | 86    | 55  | M      | CCRCC     | 2              | -     | -     |
| 11   | 68  | F      | CCRCC     | 2              | -     | -     | 87    | 69  | F      | CCRCC     | 3              | -     | -     |
| 12   | 59  | F      | CCRCC     | 3              | -     | -     | 88    | 71  | F      | CCRCC     | 2              | -     | -     |
| 13   | 72  | F      | CCRCC     | 2              | -     | -     | 89    | 60  | F      | CCRCC     | 2              | -     | -     |
| 14   | 64  | M      | CCRCC     | 3              | -     | +     | 90    | 69  | F      | CCRCC     | 3              | -     | -     |
| 15   | 69  | F      | CCRCC     | 4              | -     | -     | 91    | 49  | M      | CCRCC     | 2              | -     | +     |
| 16   | 62  | F      | PRCC      | 4              | -     | -     | 92    | 61  | M      | PRCC      | 2              | -     | -     |
| 17   | 40  | M      | CCRCC     | 2              | -     | -     | 93    | 77  | F      | CCRCC     | 2              | -     | +     |
| 18   | 57  | M      | CCRCC     | 3              | -     | -     | 94    | 46  | F      | CCRCC     | 4              | -     | -     |
| 19   | 71  | F      | CCRCC     | 3              | +     | -     | 95    | 70  | M      | CCRCC     | 2              | -     | -     |
| 20   | 73  | M      | CCRCC     | 2              | -     | -     | 96    | 55  | M      | CCRCC     | 4              | -     | -     |
| 21   | 69  | M      | CCRCC     | 2              | -     | -     | 97    | 60  | M      | CCRCC     | 2              | -     | -     |
| 22   | 65  | F      | CCRCC     | 3              | -     | -     | 98    | 50  | F      | CCRCC     | 2              | -     | -     |
| 23   | 57  | F      | CCRCC     | 3              | -     | -     | 99    | 36  | F      | CCRCC     | 3              | -     | -     |
| 24   | 75  | M      | PRCC      | 2              | -     | -     | 100   | 49  | F      | CCRCC     | 2              | -     | -     |
| 25   | 73  | F      | CCRCC     | 3              | -     | -     | 101   | 70  | M      | CCRCC     | 4              | -     | -     |
| 26   | 53  | M      | CCRCC     | 2              | -     | -     | 102   | 49  | M      | CCRCC     | 3              | -     | -     |
| 27   | 53  | F      | CCRCC     | 3              | -     | -     | 103   | 75  | F      | CCRCC     | 2              | -     | -     |
| 28   | 46  | F      | CCRCC     | 4              | -     | -     | 104   | 75  | F      | PRCC      | 2              | -     | -     |
| 29   | 67  | F      | CCRCC     | 4              | -     | -     | 105   | 67  | M      | CCRCC     | 2              | -     | -     |
| 30   | 47  | F      | CCRCC     | 4              | -     | -     | 106   | 60  | F      | CCRCC     | 2              | -     | -     |
| 31   | 70  | M      | CCRCC     | 4              | -     | -     | 107   | 70  | M      | CCRCC     | 2              | -     | -     |
| 32   | 58  | F      | CCRCC     | 3              | -     | -     | 108   | 51  | M      | CCRCC     | 2              | -     | -     |
| 33   | 55  | F      | CCRCC     | 3              | -     | -     | 109   | 43  | F      | CCRCC     | 3              | -     | -     |
| 34   | 48  | F      | CCRCC     | 2              | -     | -     | 110   | 65  | M      | CCRCC     | 4              | -     | -     |
| 35   | 48  | F      | PRCC      | 1              | -     | -     | 111   | 49  | F      | CCRCC     | 2              | -     | -     |
| 36   | 64  | F      | CCRCC     | 2              | -     | -     | 112   | 60  | F      | CCRCC     | 4              | -     | -     |
| 37   | 75  | F      | CCRCC     | 3              | -     | -     | 113   | 62  | F      | CCRCC     | 2              | -     | -     |
| 38   | 64  | F      | CCRCC     | 2              | -     | -     | 114   | 45  | M      | CCRCC     | 3              | -     | -     |
| 39   | 45  | F      | PRCC      | 2              | -     | -     | 115   | 65  | F      | CCRCC     | 2              | -     | -     |
| 40   | 54  | F      | CCRCC     | 2              | -     | -     | 116   | 65  | F      | PRCC      | 3              | -     | -     |
| 41   | 59  | F      | CCRCC     | 2              | -     | -     | 117   | 53  | M      | CCRCC     | 2              | -     | -     |
| 42   | 66  | F      | CCRCC     | 2              | -     | -     | 118   | 71  | M      | CCRCC     | 2              | -     | -     |
| 43   | 57  | F      | CCRCC     | 2              | -     | -     | 119   | 60  | M      | CCRCC     | 2              | -     | -     |
| 44   | 73  | F      | CCRCC     | 2              | -     | -     | 120   | 67  | F      | CCRCC     | 3              | -     | -     |
| 45   | 50  | F      | CCRCC     | 2              | -     | -     | 121   | 60  | M      | PRCC      | 1              | -     | -     |
| 46   | 76  | M      | CCRCC     | 2              | -     | -     | 122   | 68  | M      | CCRCC     | 2              | -     | -     |
| 47   | 74  | F      | CCRCC     | 2              | +     | -     | 123   | 59  | M      | CCRCC     | 4              | -     | -     |
| 48   | 69  | F      | CCRCC     | 4              | -     | -     | 124   | 67  | F      | PRCC      | 3              | -     | -     |
| 49   | 63  | M      | CCRCC     | 2              | -     | -     | 125   | 71  | F      | CCRCC     | 2              | -     | -     |
| 50   | 74  | M      | CCRCC     | 2              | +     | -     | 126   | 51  | M      | CCRCC     | 2              | -     | -     |

|    |    |   |       |   |   |   |     |    |   |       |   |   |   |
|----|----|---|-------|---|---|---|-----|----|---|-------|---|---|---|
| 51 | 59 | F | CCRCC | 1 | - | - | 127 | 67 | F | CCRC  | 2 | - | - |
| 52 | 53 | M | CCRCC | 2 | - | - | 128 | 76 | M | CCRCC | 2 | - | - |
| 53 | 76 | F | CCRCC | 3 | - | - | 129 | 46 | F | CCRCC | 2 | - | - |
| 54 | 58 | F | PRCC  | 2 | - | - | 130 | 66 | M | PRCC  | 1 | - | - |
| 55 | 74 | M | CCRCC | 4 | - | - | 131 | 60 | F | CCRCC | 4 | - | - |
| 56 | 26 | F | CCRCC | 2 | - | - | 132 | 49 | M | CCRCC | 3 | - | - |
| 57 | 58 | F | CCRCC | 2 | - | - | 133 | 63 | M | PRCC  | 2 | - | - |
| 58 | 45 | F | CCRCC | 2 | - | - | 134 | 51 | M | CCRCC | 2 | - | - |
| 59 | 37 | M | CCRCC | 4 | - | - | 135 | 55 | M | CCRCC | 3 | - | - |
| 60 | 48 | F | CCRCC | 4 | - | - | 136 | 70 | M | CCRCC | 2 | - | - |
| 61 | 21 | M | CCRCC | 4 | - | - | 137 | 68 | F | PRCC  | 2 | - | - |
| 62 | 72 | F | PRCC  | 3 | - | - | 138 | 73 | F | CCRCC | 1 | - | - |
| 63 | 70 | M | CCRCC | 2 | - | - | 139 | 52 | F | CCRCC | 4 | - | - |
| 64 | 67 | M | CCRCC | 2 | - | - | 140 | 65 | F | CCRCC | 3 | - | - |
| 65 | 60 | F | CCRCC | 2 | - | - | 141 | 72 | F | CCRCC | 2 | - | - |
| 66 | 63 | M | CCRCC | 3 | - | - | 142 | 62 | M | CCRCC | 2 | - | - |
| 67 | 63 | F | CCRCC | 4 | - | - | 143 | 52 | M | CCRCC | 3 | - | - |
| 68 | 42 | F | CCRCC | 2 | - | - | 144 | 34 | F | CCRCC | 2 | - | - |
| 69 | 69 | F | CCRCC | 4 | - | - | 145 | 62 | M | CCRCC | 2 | - | - |
| 70 | 77 | F | CCRCC | 2 | - | - | 146 | 43 | M | CCRCC | 2 | - | - |
| 71 | 56 | F | CCRCC | 2 | - | - | 147 | 66 | M | CCRCC | 2 | - | - |
| 72 | 67 | F | CCRCC | 2 | - | - | 148 | 68 | F | CCRCC | 2 | + | + |
| 73 | 69 | F | PRCC  | 4 | - | - | 149 | 73 | F | PRCC  | 2 | - | - |
| 74 | 47 | F | CCRCC | 2 | - | - | 150 | 49 | F | CCRCC | 2 | - | - |
| 75 | 56 | F | CCRCC | 4 | - | - | 151 | 55 | F | CCRCC | 2 | - | - |
| 76 | 67 | F | CCRCC | 2 | - | - | 152 | 72 | F | CCRCC | 4 | - | - |

M, Male, F, Female; CCRCC, Clear Cell Renal Cell Carcinoma; PRCC, Papillary Renal Cell Carcinoma; BMMF, Bovine Meat and Milk Factor; +, positive (as confirmed by sequencing); -, negative.

**Table S 1C:** Clinicopathological data and consensus BMMF1 and 2 DNA PCR results of the peritumoral kidney tissues of the Validation Collection

| Lab# | Age | Gender | Diagnosis | Clinical Stage | BMMF1 | BMMF2 | Lab# | Age | Gender | Diagnosis | Clinical Stage | BMMF1 | BMMF2 |
|------|-----|--------|-----------|----------------|-------|-------|------|-----|--------|-----------|----------------|-------|-------|
| 1    | 63  | M      | CCRCC     | 2              | -     | -     | 22   | 59  | F      | CCRCC     | 2              | -     | -     |
| 2    | 50  | M      | CCRCC     | 2              | -     | -     | 23   | 62  | M      | CCRCC     | 2              | -     | -     |
| 3    | 34  | F      | CCRCC     | 3              | -     | -     | 24   | 33  | F      | CCRCC     | 3              | -     | -     |
| 4    | 45  | M      | CCRCC     | 2              | -     | -     | 25   | 49  | F      | CCRCC     | 3              | -     | -     |
| 5    | 60  | M      | CCRCC     | 2              | -     | -     | 26   | 37  | M      | CCRCC     | 4              | -     | -     |
| 6    | 59  | F      | CCRCC     | 2              | -     | -     | 27   | 58  | F      | CCRCC     | 2              | -     | +     |
| 7    | 54  | M      | CCRCC     | 2              | -     | -     | 28   | 55  | F      | CCRCC     | 2              | -     | -     |
| 8    | 46  | F      | CCRCC     | 2              | -     | -     | 29   | 48  | F      | CCRCC     | 4              | -     | -     |
| 9    | 50  | M      | CCRCC     | 2              | -     | -     | 30   | 56  | F      | CCRCC     | 2              | -     | +     |
| 10   | 61  | M      | CCRCC     | 2              | -     | -     | 31   | 47  | M      | CCRCC     | 2              | -     | +     |
| 11   | 63  | F      | CCRCC     | 4              | -     | -     | 32   | 40  | M      | CCRCC     | 2              | -     | +     |
| 12   | 42  | F      | CCRCC     | 2              | -     | -     | 33   | 50  | F      | CCRCC     | 3              | -     | +     |
| 13   | 36  | F      | CCRCC     | 2              | -     | -     | 34   | 55  | M      | CCRCC     | 3              | -     | +     |
| 14   | 67  | F      | CCRCC     | 2              | -     | -     | 35   | 43  | F      | CCRCC     | 2              | +     | +     |
| 15   | 74  | M      | CCRCC     | 2              | -     | -     | 36   | 52  | M      | CCRCC     | 4              | -     | +     |
| 16   | 56  | F      | CCRCC     | 2              | -     | -     | 37   | 35  | M      | CCRCC     | 2              | -     | +     |
| 17   | 72  | M      | CCRCC     | 3              | -     | -     | 38   | 63  | M      | CCRCC     | 2              | -     | -     |

|    |    |   |       |   |   |   |    |    |   |       |   |   |   |
|----|----|---|-------|---|---|---|----|----|---|-------|---|---|---|
| 18 | 60 | M | CCRCC | 2 | - | - | 39 | 53 | M | CCRCC | 2 | - | - |
| 19 | 69 | F | CCRCC | 4 | - | - |    |    |   |       |   |   |   |
| 20 | 53 | M | CCRCC | 2 | - | - |    |    |   |       |   |   |   |
| 21 | 77 | F | CCRCC | 4 | - | - |    |    |   |       |   |   |   |

M, Male; F, Female, CCRCC, Clear Cell Renal Cell Carcinoma; PRCC, Papillary Renal Cell Carcinoma; BMMF, Bovine Meat and Milk Factor; +, positive (as confirmed by sequencing); -, negative.

## Supplementary tables

**Table S 2A:** Clinicopathological data and consensus BMMF1 and 2 DNA PCR results of the Hepatocellular Carcinoma (HCC) Control Collection

| Lab ID | Gender | Age | Diagnosis     | Clinical Stage | BMMF1 | BMMF2 | Lab ID | Gender | Age | Diagnosis     | Clinical Stage | BMMF1 | BMMF2 |
|--------|--------|-----|---------------|----------------|-------|-------|--------|--------|-----|---------------|----------------|-------|-------|
| HCC1   | M      | 77  | HCC NOS       | II             | -     | -     | HCC31  | M      | 76  | HCC NOS       | IA             | -     | -     |
| HCC2   | F      | 48  | HCC NOS       | III            | -     | -     | HCC32  | M      | 49  | HCC NOS       | IA             | -     | -     |
| HCC3   | M      | 46  | HCC NOS       | II             | -     | -     | HCC33  | F      | 81  | HCC NOS       | III            | -     | -     |
| HCC4   | M      | 61  | HCC NOS       | II             | -     | -     | HCC34  | M      | 80  | HCC NOS       | III            | -     | -     |
| HCC5   | F      | 48  | HCC NOS       | III            | -     | -     | HCC35  | M      | 75  | fibrolamellar | III            | -     | -     |
| HCC6   | F      | 58  | HCC NOS       | III            | -     | -     | HCC36  | M      | 64  | HCC NOS       | II             | -     | -     |
| HCC7   | F      | 28  | HCC NOS       | IB             | -     | -     | HCC37  | F      | 65  | Clear cell    | II             | -     | -     |
| HCC8   | M      | 55  | HCC NOS       | IB             | -     | -     | HCC38  | F      | 57  | HCC NOS       | IA             | -     | -     |
| HCC9   | M      | 55  | HCC NOS       | III            | -     | -     | HCC39  | F      | 76  | HCC NOS       | III            | -     | -     |
| HCC10  | M      | 62  | HCC NOS       | III            | -     | -     | HCC40  | F      | 56  | HCC NOS       | II             | -     | -     |
| HCC11  | M      | 80  | HCC NOS       | III            | +     | -     | HCC41  | M      | 69  | HCC NOS       | III            | -     | -     |
| HCC12  | F      | 63  | HCC NOS       | II             | -     | -     | HCC42  | F      | 72  | Steatohepatic | II             | -     | -     |
| HCC13  | F      | 61  | HCC NOS       | IB             | -     | -     | HCC43  | M      | 60  | HCC NOS       | II             | -     | -     |
| HCC14  | M      | 77  | HCC NOS       | III            | -     | -     | HCC44  | M      | 60  | HCC NOS       | IB             | -     | -     |
| HCC15  | F      | 69  | HCC NOS       | II             | -     | -     | HCC45  | M      | 77  | HCC NOS       | III            | -     | -     |
| HCC16  | M      | 68  | HCC NOS       | IA             | -     | -     | HCC46  | M      | 74  | HCC NOS       | II             | -     | -     |
| HCC17  | M      | 73  | fibrolamellar | IA             | -     | -     | HCC47  | M      | 74  | Steatohepatic | II             | -     | -     |
| HCC18  | M      | 71  | Clear cell    | IA             | -     | -     | HCC48  | M      | 75  | HCC NOS       | II             | -     | -     |
| HCC19  | F      | 59  | HCC NOS       | III            | -     | -     | HCC49  | F      | 62  | HCC NOS       | IB             | -     | -     |
| HCC20  | F      | 63  | Clear cell    | II             | -     | -     | HCC50  | F      | 84  | HCC NOS       | II             | -     | -     |
| HCC21  | F      | 60  | HCC NOS       | II             | -     | -     | HCC51  | M      | 63  | HCC NOS       | II             | -     | -     |
| HCC22  | F      | 70  | HCC NOS       | III            | -     | -     | HCC52  | M      | 75  | Steatohepatic | II             | -     | -     |
| HCC23  | M      | 73  | HCC NOS       | IA             | -     | -     | HCC53  | F      | 62  | HCC NOS       | II             | -     | -     |
| HCC24  | M      | 77  | HCC NOS       | III            | -     | -     | HCC54  | M      | 64  | HCC NOS       | IV             | -     | -     |
| HCC25  | M      | 74  | steatohepatic | III            | -     | -     | HCC55  | F      | 58  | HCC NOS       | II             | -     | -     |
| HCC26  | M      | 50  | HCC NOS       | IV             | -     | -     | HCC56  | M      | 63  | HCC NOS       | IA             | -     | -     |
| HCC27  | M      | 65  | HCC NOS       | IA             | -     | -     | HCC57  | M      | 73  | Steatohepatic | II             | -     | -     |
| HCC28  | M      | 81  | HCC NOS       | III            | -     | -     | HCC58  | M      | 77  | HCC NOS       | III            | -     | -     |
| HCC29  | F      | 69  | HCC NOS       | III            | -     | -     | HCC59  | F      | 84  | HCC NOS       | III            | -     | -     |
| HCC30  | M      | 66  | steatohepatic | III            | -     | -     | HCC60  | M      | 63  | Clear cell    | II             | -     | -     |

NOS, Neoplasm; M, Male; F, Female, HCC, Hepatocellular Carcinoma; BMMF, Bovine Meat and Milk Factor; +, positive (as confirmed by sequencing); -, negative.

**Table S 2B:** Clinicopathological data and consensus BMMF1 and 2 DNA PCR results of the corresponding peritumoral liver tissues of the HCC Control Collection (see table S 2A)

| Lab ID | Gender | Age | Diagnosis     | Clinical Stage | BMMF1 | BMMF2 | Lab ID | Gender | Age | Diagnosis     | Clinical Stage | BMMF1 | BMMF2 |
|--------|--------|-----|---------------|----------------|-------|-------|--------|--------|-----|---------------|----------------|-------|-------|
| 1      | M      | 77  | HCC NOS       | II             | -     | -     | 26     | M      | 80  | HCC NOS       | IA             | -     | -     |
| 2      | F      | 48  | HCC NOS       | III            | -     | -     | 27     | M      | 75  | HCC NOS       | IA             | -     | -     |
| 3      | M      | 61  | HCC NOS       | II             | -     | -     | 28     | M      | 64  | HCC NOS       | III            | -     | -     |
| 4      | M      | 48  | HCC NOS       | II             | -     | -     | 29     | F      | 65  | HCC NOS       | III            | -     | -     |
| 5      | F      | 58  | HCC NOS       | III            | -     | -     | 30     | F      | 75  | fibrolamellar | III            | -     | -     |
| 6      | F      | 28  | HCC NOS       | III            | -     | -     | 31     | F      | 76  | HCC NOS       | II             | -     | -     |
| 7      | F      | 55  | HCC NOS       | IB             | -     | -     | 32     | F      | 65  | Clear cell    | II             | -     | -     |
| 8      | M      | 55  | HCC NOS       | IB             | -     | -     | 33     | M      | 69  | HCC NOS       | IA             | -     | -     |
| 9      | M      | 62  | HCC NOS       | III            | -     | -     | 34     | F      | 72  | HCC NOS       | III            | -     | -     |
| 10     | M      | 61  | HCC NOS       | III            | -     | -     | 35     | M      | 60  | HCC NOS       | II             | -     | -     |
| 11     | M      | 77  | HCC NOS       | III            | -     | -     | 36     | M      | 77  | HCC NOS       | III            | -     | -     |
| 12     | F      | 68  | HCC NOS       | II             | -     | -     | 37     | M      | 74  | steatohepatic | II             | -     | -     |
| 13     | F      | 73  | HCC NOS       | IB             | -     | -     | 38     | M      | 74  | HCC NOS       | II             | -     | -     |
| 14     | M      | 71  | HCC NOS       | III            | -     | -     | 39     | M      | 75  | HCC NOS       | IB             | -     | -     |
| 15     | F      | 59  | HCC NOS       | II             | -     | -     | 40     | F      | 62  | HCC NOS       | III            | -     | -     |
| 16     | M      | 60  | HCC NOS       | IA             | -     | -     | 41     | F      | 84  | HCC NOS       | II             | -     | -     |
| 17     | M      | 73  | fibrolamellar | IA             | -     | -     | 42     | M      | 75  | steatohepatic | II             | -     | -     |
| 18     | M      | 71  | Clear cell    | IA             | -     | -     | 43     | M      | 75  | HCC NOS       | II             | -     | -     |
| 19     | F      | 50  | HCC NOS       | III            | -     | -     | 44     | F      | 62  | HCC NOS       | IB             | -     | -     |
| 20     | F      | 63  | Clear cell    | II             | -     | -     | 45     | M      | 64  | HCC NOS       | II             | -     | -     |
| 21     | F      | 81  | HCC NOS       | II             | -     | -     | 46     | F      | 58  | HCC NOS       | II             | -     | -     |
| 22     | F      | 69  | HCC NOS       | III            | -     | +     | 47     | M      | 73  | steatohepatic | II             | -     | -     |
| 23     | M      | 76  | HCC NOS       | IA             | -     | -     | 48     | M      | 63  | HCC NOS       | II             | -     | -     |
| 24     | M      | 49  | HCC NOS       | III            | -     | -     | 49     | M      | 77  | HCC NOS       | IV             | -     | -     |
| 25     | M      | 74  | steatohepatic | III            | -     | -     | 50     | M      | 63  | HCC NOS       | II             | -     | -     |

M, Male, F, Female, HCC, Hepatocellular Carcinoma; BMMF, Bovine Meat and Milk;  
+, positive (as confirmed by sequencing); -, negative.

Figure S1:

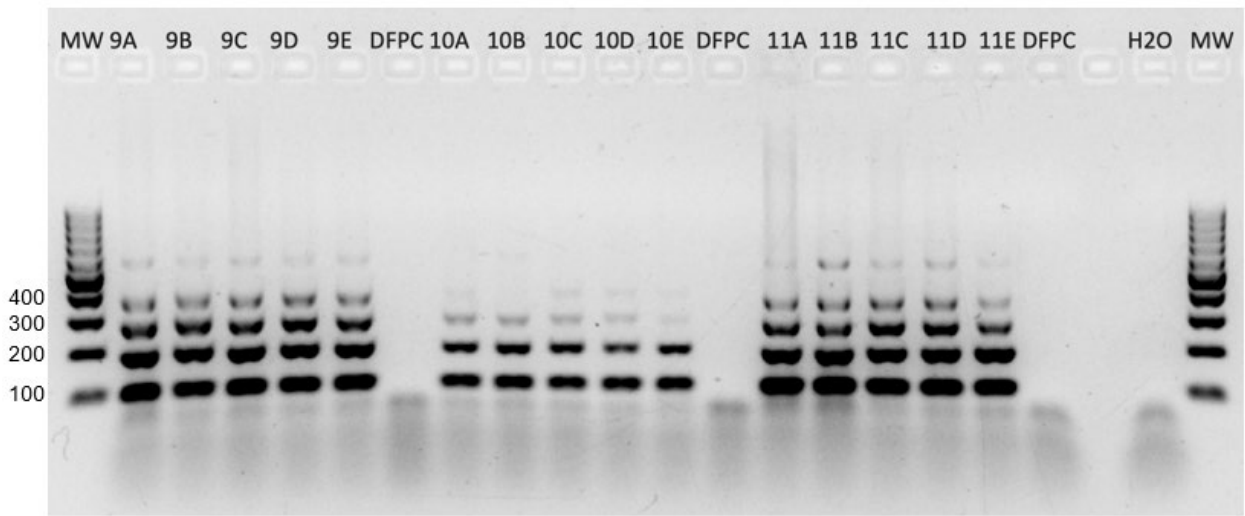

**Fig. S1** Agarose gel showing the specimen control size (SCS) ladder protocol to validate the DNA quality to be eligible for PCR testing. Abbreviations: H2O water non-template negative control; DFPC, DNA-free paraffin control; MW, molecular weight marker (Invitrogen™, 100bp DNA ladder)

Figure S2 :

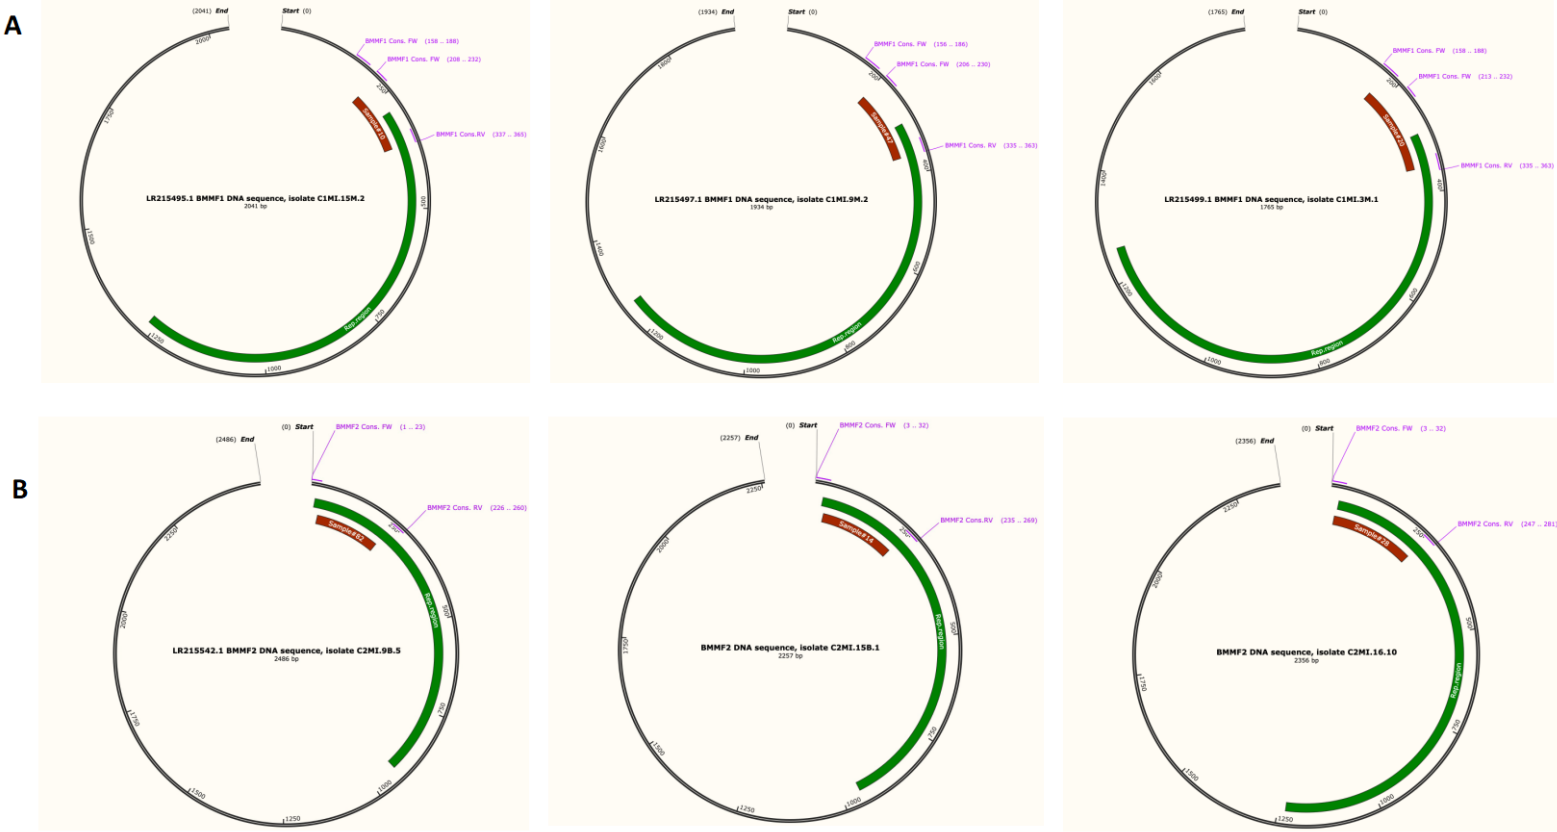

**Fig. S2** Schematic illustration of entire BMMF DNA aligned with consensus primers and sequence result examples of findings in RCC collections. Replication region (green); our sequence result (red). (A) BMMF1, samples no.10, 47 from RCC of validation and no. 20 from test collection, and (B) BMMF2, samples no. 82, 14 from RCC of validation and no. 28 from test collection (Created with SnapGene®)

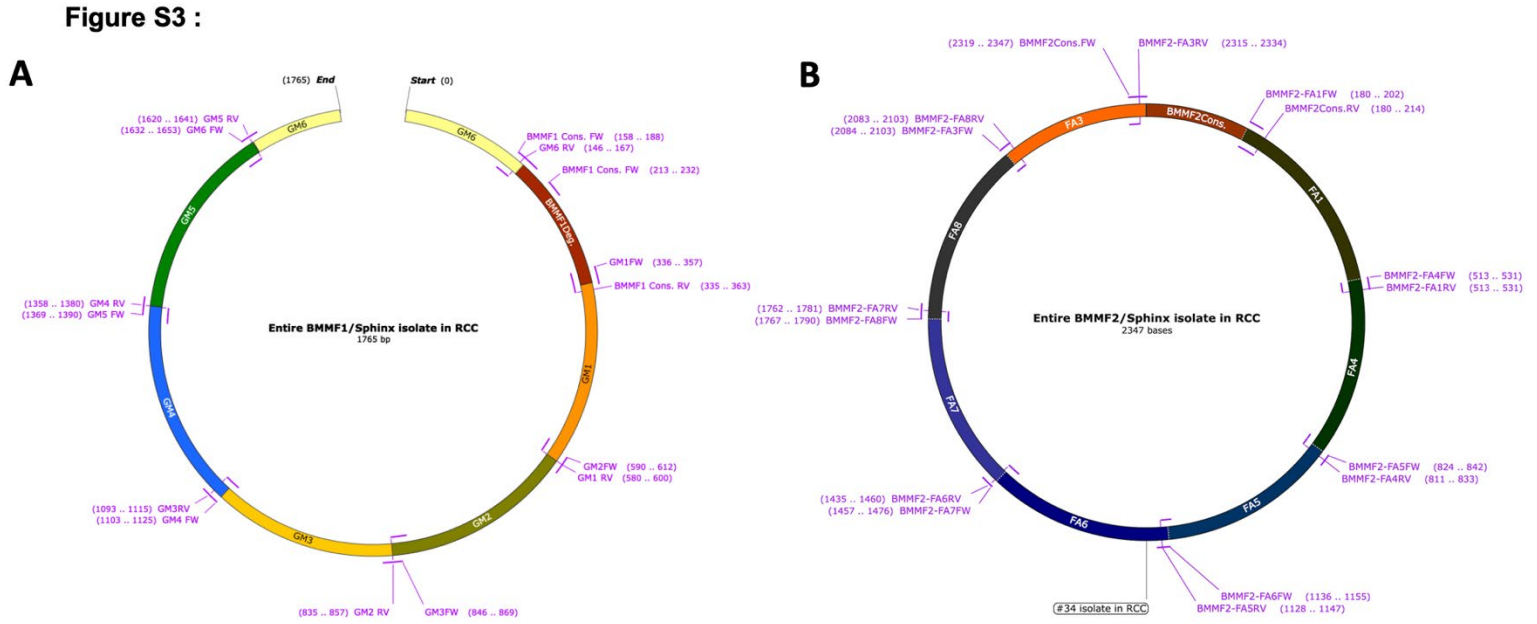

**Fig. S3** Schematic illustration of BMMF1/Sphinx and BMMF2/Sphinx entire genome characterization in RCC and peritumoral tissues of validation collection respectively. (A) Sample no. 47 and (B) Sample no. 34 (Created with SnapGene®)

**Figure S4 A:**

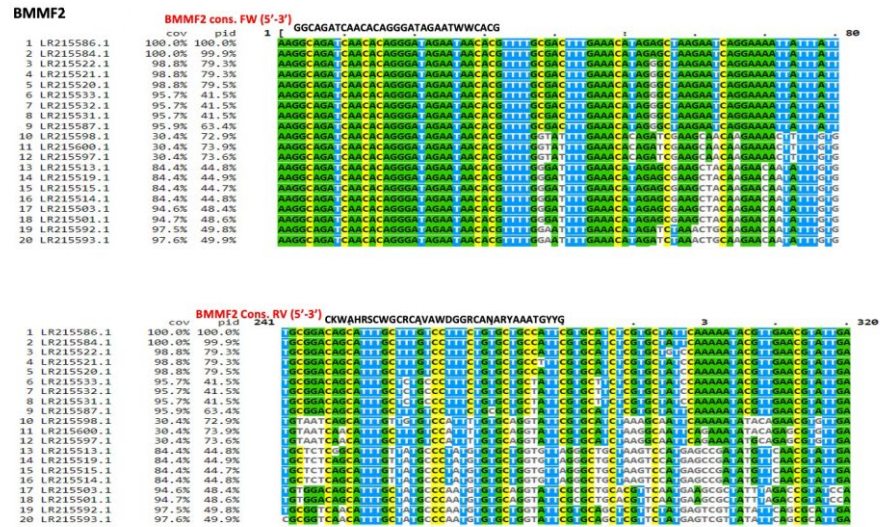



**Figure S4 B:**

**BMMF1**

cov pid 81 1 2 3

1 LR215499.1 100.0% 100.0%  
 2 LR215494.1 99.5% 69.5%  
 3 LR215495.1 99.6% 63.5%  
 4 LR215497.1 98.5% 71.2%  
 5 LR215496.1 98.5% 71.3%  
 6 LR215498.1 26.0% 73.2%  
 consensus/100%  
 consensus/90%  
 consensus/80%  
 consensus/70%

**BMMF1 Cons. FW (5'-3')** GAK 160

1000

**BMMF2**

cov pid 241 1 2 3 4

1 LR215499.1 100.0% 100.0%  
 2 LR215494.1 99.5% 69.5%  
 3 LR215495.1 99.6% 63.5%  
 4 LR215497.1 98.5% 71.2%  
 5 LR215496.1 98.5% 71.3%  
 6 LR215498.1 26.0% 73.2%  
 consensus/100%  
 consensus/90%  
 consensus/80%  
 consensus/70%

**BMMF2 Cons. RV (5'-3')** GATCCAAAGTTGTAAGTACGCTGTTATGAGG 400
